# Supplementary material for: A biomathematical model of immune response and barrier function in mice with pneumococcal lung infection
Source: PubMed Central journal article supplement (PMC7714238; doi:10.1371/journal.pone.0243147), 2020-12-03
Supplement: pone.0243147.s001.pdf [file pone.0243147.s001.pdf]

# A biomathematical model of immune response and barrier function in mice with pneumococcal lung infection – supplement material

Sibylle Schirm<sup>1</sup>Peter Ahnert<sup>1</sup>, Sarah Berger<sup>2</sup>, Geraldine Nouailles<sup>2</sup>, Sandra-Maria Wienhold<sup>2</sup>, Holger Müller-Redetzky<sup>2,3</sup>, Norbert Suttorp<sup>3</sup>, Markus Loeffler<sup>1</sup>, Martin Witzenrath<sup>2,3</sup>, Markus Scholz<sup>1,4\*</sup>

**1** Institute for Medical Informatics, Statistics and Epidemiology, University of Leipzig, Leipzig, Germany

**2** Division of Pulmonary Inflammation, Charité – Universitätsmedizin Berlin, corporate member of Freie Universität Berlin, Humboldt-Universität zu Berlin, and Berlin Institute of Health, Charitéplatz 1, 10117, Berlin, Germany

**3** Department of Infectious Diseases and Respiratory Medicine, Charité – Universitätsmedizin Berlin, corporate member of Freie Universität Berlin, Humboldt-Universität zu Berlin, and Berlin Institute of Health, Berlin, Germany

**4** LIFE Research Center of Civilization Diseases, University of Leipzig, Leipzig, Germany

\* markus.scholz@imise.uni-leipzig.de

# Parameter sensitivity

A comprehensive sensitivity analysis is performed to determine parameter identifiability. We calculated the deterioration in fitness function after changing the optimal value of a single parameter by  $\pm 10\%$  while the other parameters were kept constant (see Figure S1). The parameters  $k_P$ ,  $d_{CCL2}$ ,  $k_{DEA}$ ,  $k_{CFUB\_P}$ ,  $d_{IM}$ ,  $k_{DN}$ , and  $k_{N\_IL6}$  are most sensitive.

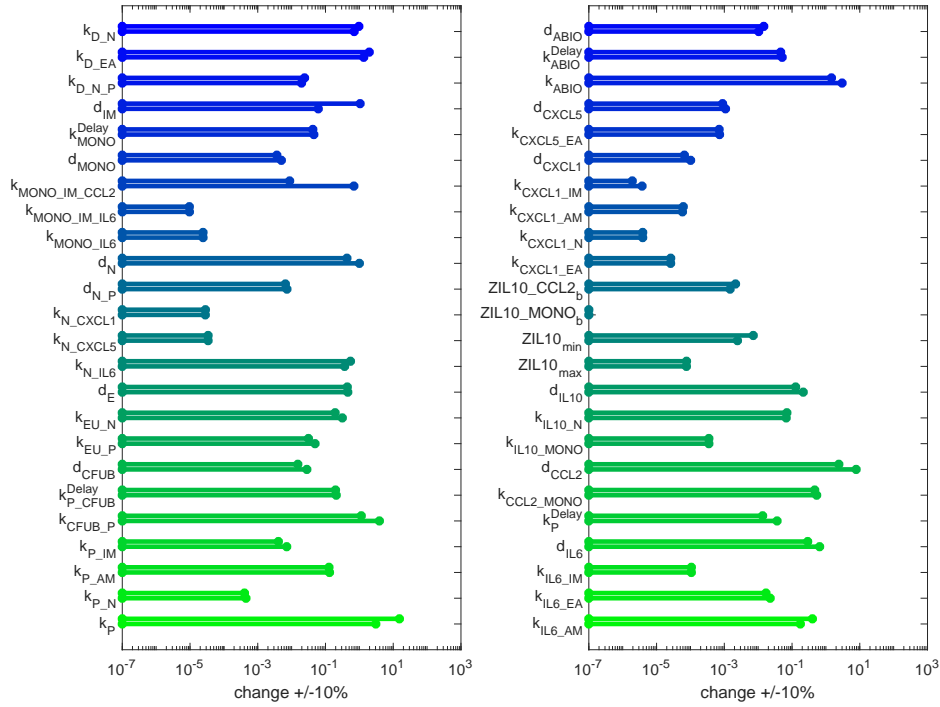

**Fig S1. Parameter sensitivity 1.** Single parameter values were changed by  $\pm 10\%$  while the other parameters were kept constant. Corresponding relative deterioration of the fitness function was calculated as a measure of sensitivity of the considered parameter. Longer bars correspond to more sensitive parameters, i.e. better identifiability.

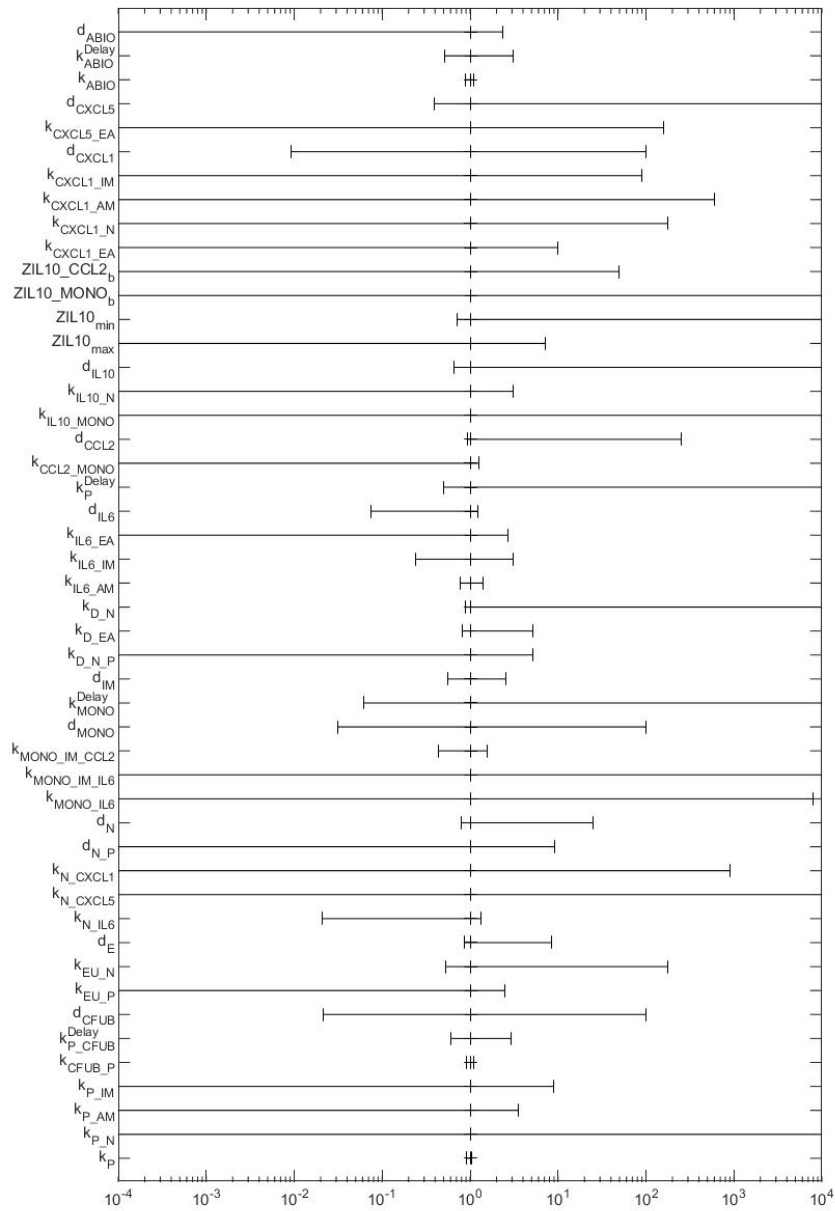

**Fig S2. Parameter sensitivity 2.** Single parameter values were changed until a deterioration of the fitness function of  $\pm 2.5\%$  is reached. The other parameters were kept constant. The x-axis shows the corresponding relative change of the parameters. It revealed that for certain model parameters only upper or lower bounds are well identifiable.

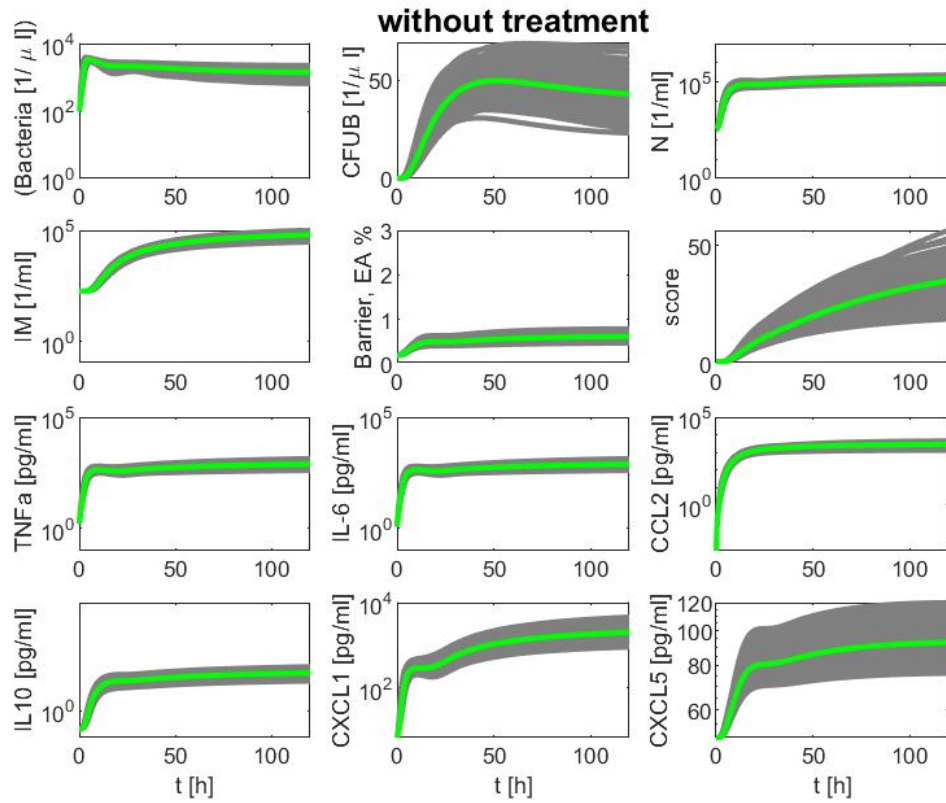

**Fig S3. Certainty of prediction in a scenario without treatment.** Parameter values were changed randomly with a variance of 0.1 (100 samples) and resulting model predictions are displayed in grey. The green curve corresponds to the parameter settings in Table S2, S3 and S4.

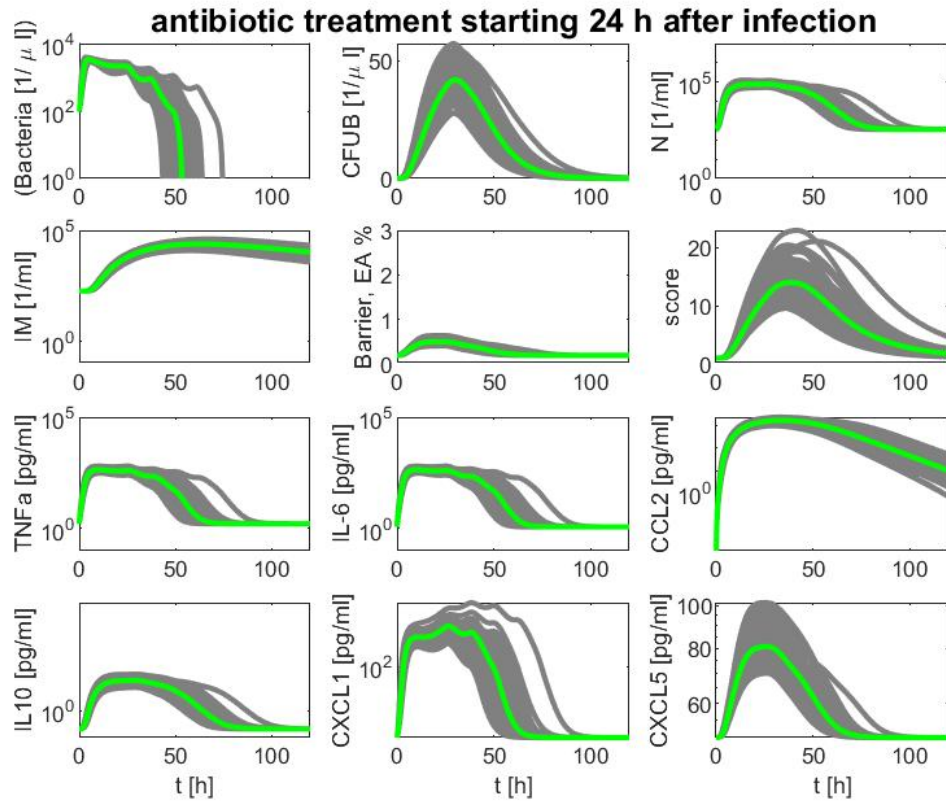

**Fig S4. Certainty of prediction in a scenario with antibiotic treatment starting 24 hours after infection.** Parameter values were changed randomly with a variance of 0.1 (100 samples) and resulting model predictions are displayed in grey. The green curve corresponds to the parameter settings in Table S2, S3 and S4.

## Parameters

We here present initial conditions and parameter settings of our model.

**Table S1. Initial conditions.** Values were taken from Data.

|               |                                              |          |
|---------------|----------------------------------------------|----------|
| $P_0$         | bacteria in BALF                             | 1.00E-06 |
| $CFUB_0$      | bacteria in blood                            | 1.00E-06 |
| $EU_0$        | epithelial cells                             | 9.98E+01 |
| $EA_0$        | activated epithelial cells                   | 1.93E-01 |
| $N_0$         | neutrophils                                  | 3.51E+02 |
| $AM_0$        | alveolar macrophages                         | 2.87E+04 |
| $IM_0$        | inflammatory macrophages                     | 1.88E+02 |
| $MONO_0$      | monocytes                                    | 2.01E-01 |
| $IL6_0$       | IL-6                                         | 1.18E+00 |
| $IL10_0$      | IL-10                                        | 2.10E-01 |
| $CCL2_0$      | CCL2                                         | 0.00E+00 |
| $TNF\alpha_0$ | TNF $\alpha$                                 | 1.64E+00 |
| $IM_{sv}$     | condition for delay compartment (calculated) | 1.07E-06 |
| $CXCL1_0$     | CXCL1                                        | 7.05E+00 |
| $CXCL5_0$     | CXCL5                                        | 5.02E+01 |
| $D_0$         | score                                        | 1.00E+00 |

**Table S2. Cell kinetic parameters.**

| compartments $P$ and $CFUB$  |                                                      |          |                                |
|------------------------------|------------------------------------------------------|----------|--------------------------------|
| EffInf                       | rate of colonizing bacteria                          | 1.00E-03 | set (data: 320-2560 / $\mu$ l) |
| $k_P$                        | initial growth rate of bacteria                      | 2.00E+00 | fitted [1]                     |
| $P_{\max}$                   | maximal number of bacteria                           | 5.00E+03 | set (data: 42-14200 / $\mu$ l) |
| $k_{PN}$                     | bacterial clearance by neutrophils                   | 2.45E-05 | fitted                         |
| $k_{P\_AM}$                  | bacterial clearance by AM                            | 3.14E-04 | fitted                         |
| $k_{P\_IM}$                  | bacterial clearance by IM                            | 4.10E-04 | fitted                         |
| $n$                          | Michaelis-Menten constant                            | 5.00E+00 | set (not identifiable)         |
| $k_{CFUB\_P}$                | migration rate of bacteria through barrier           | 2.30E+00 | fitted                         |
| $k_{P\_CFUB}^{\text{Delay}}$ | delay of bacterial migration                         | 1.17E-01 | fitted                         |
| $d_{CFUB}$                   | bacterial clearance in blood                         | 4.72E+01 | fitted                         |
| compartments $EU$ and $EA$   |                                                      |          |                                |
| $k_{EU\_P}$                  | epithelial cells activation rate due to bacteria     | 1.38E-07 | fitted                         |
| $k_{EU\_N}$                  | epithelial cells activation rate due to neutrophils  | 1.32E-08 | fitted                         |
| $P_{EU}$                     | steady-state production of epithelial cells          | 4.64E-04 | set (steady state cond.)       |
| $d_E$                        | degradation rate of affected epithelial cells        | 4.19E-01 | fitted                         |
| $P_{EA}$                     | steady-state production of affected epithelial cells | 8.05E-02 | set (steady state cond.)       |
| compartment $N$              |                                                      |          |                                |
| $k_{N\_IL6}$                 | neutrophil recruitment by IL-6                       | 4.75E+01 | fitted                         |
| $k_{N\_CXCL5}$               | neutrophil recruitment by CXCL5                      | 6.66E-02 | fitted                         |
| $k_{N\_CXCL1}$               | neutrophil recruitment CXCL1                         | 1.50E-02 | fitted                         |
| $N_{\max}$                   | maximum number of neutrophils in alveolar space      | 1.59E+06 | set (from data)                |
| $d_{N\_P}$                   | bacterial-induced neutrophil death rate              | 4.75E-06 | fitted                         |
| $d_N$                        | neutrophil apoptosis rate                            | 2.17E-01 | fitted                         |
| $P_N$                        | neutrophil migration in steady-state                 | 1.67E+01 | set (steady state cond.)       |
| compartments $MONO$ and $IM$ |                                                      |          |                                |
| $k_{MONO\_IL6}$              | monocyte recruitment rate by IL-6                    | 1.25E-04 | fitted                         |
| $k_{MONO\_IM\_IL6}$          | monocyte differentiation rate by IL-6                | 1.02E-06 | fitted                         |
| $k_{MONO\_IM\_CCL2}$         | monocyte differentiation rate by CCL2                | 3.09E-03 | fitted                         |
| $d_{MONO}$                   | monocyte degradation rate                            | 3.00E+02 | fitted                         |
| $P_{MONO}$                   | steady-state influx of monocytes                     | 6.04E+01 | set (steady state cond.)       |
| $k_{MONO}^{\text{Delay}}$    | delay of monocyte differentiation                    | 2.27E-01 | fitted                         |
| $k_{MONO}$                   | translates units                                     | 1.00E+03 | set                            |
| $d_{IM}$                     | macrophage degradation rate                          | 2.15E-02 | fitted                         |
| $P_{IM}$                     | steady-state influx of macrophage                    | 4.05E+00 | set (steady state cond.)       |
| compartment $D$              |                                                      |          |                                |
| $k_{D\_N\_P}$                | debris from bacterial-induced neutrophil death       | 3.65E-10 | fitted                         |
| $k_{D\_EA}$                  | debris from epithelial cell death                    | 1.93E-01 | fitted                         |
| $k_{D\_N}$                   | debris from neutrophil death                         | 9.11E-06 | fitted                         |
| $d_D$                        | debris degradation rate                              | 4.05E-02 | set (steady state cond.)       |

**Table S3. Cytokine and chemokine related parameters.**

| compartment <i>IL-6</i>                   |                                                          |          |                          |
|-------------------------------------------|----------------------------------------------------------|----------|--------------------------|
| $k_{IL6\_AM}$                             | IL-6 production by AM                                    | 1.97E-04 | fitted                   |
| $k_{IL6\_IM}$                             | IL-6 production by IM                                    | 2.30E-04 | fitted                   |
| $k_{IL6\_EA}$                             | IL-6 production by EA                                    | 1.65E+01 | fitted                   |
| $d_{IL6}$                                 | IL-6 degradation                                         | 3.61E+01 | fitted                   |
| $P_{IL6}$                                 | IL-6 production in steady-state                          | 3.94E+01 | set (steady state cond.) |
| $k_P^{Delay}$                             | delay of IL-6 production by macrophages                  | 3.06E-01 | fitted                   |
| compartment <i>TNF<math>\alpha</math></i> |                                                          |          |                          |
| $k_{TNFa\_AM}$                            | TNF $\alpha$ production by AM                            | 1.97E-04 | set (analog. to IL-6)    |
| $k_{TNFa\_IM}$                            | TNF $\alpha$ production by IM                            | 2.30E-04 | set (analog. to IL-6)    |
| $k_{TNFa\_EA}$                            | TNF $\alpha$ production by EA                            | 1.65E+01 | set (analog. to IL-6)    |
| $d_{TNFa}$                                | TNF $\alpha$ degradation                                 | 3.61E+01 | set (analog. to IL-6)    |
| $P_{TNFa}$                                | TNF $\alpha$ production in steady-state                  | 5.58E+01 | set (steady state cond.) |
| compartment <i>CCL2</i>                   |                                                          |          |                          |
| $k_{CCL2\_MONO}$                          | CCL2 production by monocytes                             | 5.12E+02 | fitted                   |
| $d_{CCL2}$                                | CCL2 degradation                                         | 7.40E-02 | fitted                   |
| compartment <i>IL-10</i>                  |                                                          |          |                          |
| $k_{IL10\_MONO}$                          | IL-10 production by monocytes                            | 1.15E-01 | fitted                   |
| $k_{IL10\_N}$                             | IL-10 production by neutrophils                          | 4.98E-05 | fitted                   |
| $d_{IL10}$                                | IL-10 degradation                                        | 2.96E-01 | fitted                   |
| $P_{IL10}$                                | IL-10 production in steady-state                         | 2.17E-02 | set (steady state cond.) |
| $ZIL10_{max}$                             | maximum suppression by IL-10                             | 1.38E-01 | fitted                   |
| $ZIL10_{min}$                             | minimum suppression by IL-10                             | 1.39E+00 | fitted                   |
| $ZIL10_{nor}$                             | steady-state suppression by IL-10                        | 1.00E+00 | set (steady state cond.) |
| $ZIL10\_MONO_b$                           | sensitivity of monocyte recruitment suppression by IL-10 | 4.14E+00 | fitted                   |
| $ZIL10\_CCL2_b$                           | sensitivity of CCL2 production to IL-10                  | 2.02E-02 | fitted                   |
| compartment <i>CXCL1</i>                  |                                                          |          |                          |
| $k_{CXCL1\_EA}$                           | CXCL1 production by EA                                   | 1.65E+04 | fitted                   |
| $k_{CXCL1\_N}$                            | CXCL1 production by neutrophils                          | 4.57E-02 | fitted                   |
| $k_{CXCL1\_AM}$                           | CXCL1 production by AM                                   | 1.68E-03 | fitted                   |
| $k_{CXCL1\_IM}$                           | CXCL1 production by IM                                   | 1.05E-02 | fitted                   |
| $d_{CXCL1}$                               | CXCL1 degradation                                        | 4.90E+02 | fitted                   |
| $P_{CXCL1}$                               | CXCL1 production in steady-state                         | 2.58E+02 | set (steady state cond.) |
| compartment <i>CXCL5</i>                  |                                                          |          |                          |
| $k_{CXCL5\_EA}$                           | CXCL5 production by EA                                   | 3.31E+01 | fitted                   |
| $d_{CXCL5}$                               | CXCL5 degradation                                        | 3.28E-01 | fitted                   |
| $P_{CXCL5}$                               | CXCL5 production in steady-state                         | 1.01E+01 | set (steady state cond.) |



**Table S4. Intervention related parameters.**

|                                  |                                         |          |        |
|----------------------------------|-----------------------------------------|----------|--------|
| $t_{\text{Pneu}}$                | inhalation time                         | 1.67E-02 | set    |
| $t_{\text{ABIO}}$                | injection time for antibiotic treatment | 1.00E-01 | set    |
| $k_{\text{ABIO}}$                | antibiotic effect factor                | 6.92E+00 | fitted |
| $k_{\text{ABIO}}^{\text{Delay}}$ | delay of antibiotic effect              | 6.66E-01 | fitted |
| $d_{\text{ABIO}}$                | clearance of antibiotics                | 7.74E-03 | fitted |
| $ZD19_{\text{max}}$              | maximal suppression by D19              | 0.00E+00 | set    |
| $ZD19_{\text{min}}$              | minimal suppression by D19              | 1.00E+00 | set    |
| $ZD19_{\text{nor}}$              | suppression for 1 mg/kg D19             | 5.84E-01 | fitted |
| $ZD19_{\text{b}}$                | sensitivity parameter                   | 3.27E-01 | fitted |

## Model Predictions

**Table S5. Prediction.** Simulated maximum barrier impairment, maximum bacteremia and maximum pneumococcal population in BALF within the first 48 hours and the impact of antibiotic and D19 treatment thereon.

| scenario                               | bacteria in BALF | bacteria in blood | barrier EA |
|----------------------------------------|------------------|-------------------|------------|
| without therapy                        | 3.39E+03         | 4.96E+01          | 5.50E-01   |
| 2 mg/kg D19                            | 3.59E+03         | 5.05E+01          | 4.12E-01   |
| 20 mg/kg D19                           | 3.73E+03         | 4.58E+01          | 3.04E-01   |
| antibiotics 24h                        | 3.39E+03         | 4.18E+01          | 4.98E-01   |
| antibiotics 24h, D19 20 mg/kg          | 3.73E+03         | 3.71E+01          | 2.94E-01   |
| antibiotics 48h                        | 3.39E+03         | 4.96E+01          | 5.50E-01   |
| antibiotics 48h, D19 20 mg/kg          | 3.73E+03         | 4.58E+01          | 3.04E-01   |
| relative change (with D19/without D19) |                  |                   |            |
| antibiotics 24 h                       | 1.10E+00         | 8.87E-01          | 5.91E-01   |
| antibiotics 48 h                       | 1.10E+00         | 9.24E-01          | 5.53E-01   |

## References

1. Smith AM, McCullers JA, Adler FR. Mathematical Model of a Three-Stage Innate Immune Response to a Pneumococcal Lung Infection. *J Theor Biol.* 2011;276(1):106–116.
